# Supplementary material for: Lymphovascular Space Invasion in Early-Stage Endometrial Cancer (LySEC): Patterns of Recurrence and Predictors. A Multicentre Retrospective Cohort Study of the Spain Gynecologic Oncology Group
Source: MDPI journal article supplement (doi:10.3390/cancers15092612), 2023-05-04
Supplement: s1 [file cancers-2318152-supplementary.pdf › cancers-2318152-supplementary.pdf]

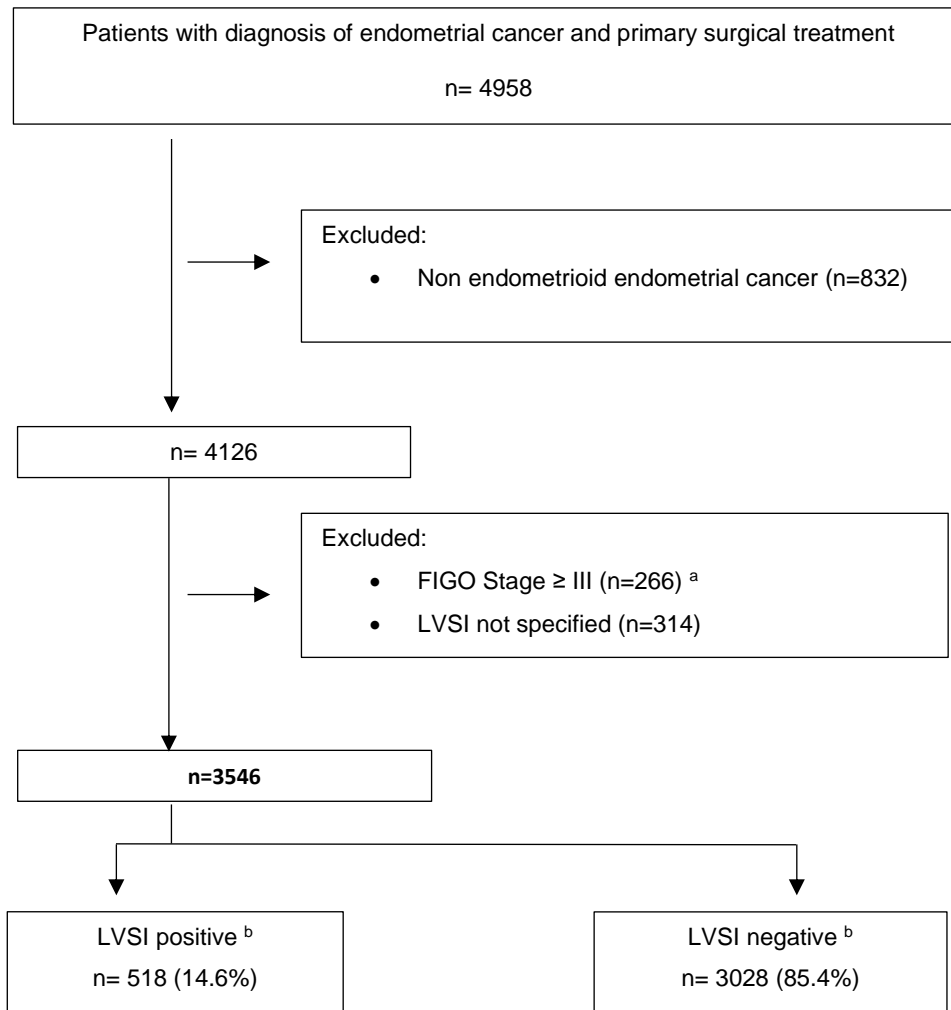

**Figure S1. Flow chart of the study population.** <sup>a</sup> FIGO 2009 (18) <sup>b</sup> LVSI positive: diffuse or multifocal presence of tumor cells inside a space surrounded by endothelial cells detected on hematoxylin-eosin-stained sections (substantial LVSI). LVSI negative: No or focal LVSI (4). *LVSI*, Lymphovascular Space Involvement; *FIGO*, Federation of Gynaecology and Obstetrics.
